# Supplementary material for: WITHDRAWN: Identification of platelets related THBS1 as a critical gene in sepsis related thrombocytopenia via an integrated bioinformatic analysis
Source: Research Square preprint supplement (doi:10.21203/rs.3.rs-2239983/v1), 2022-11-10
Supplement: Supplementary file 1 [file bf187da3ee0cc8c379d17b23.xlsx]

## Sheet: Supplementary Table 2
Names	total	elements
DEGs.up Platelet.gene	56	LHFPL2
		BLOC1S2
		CLEC1B
		MYL12A
		ORM1
		PIK3CB
		PPBP
		FERMT3
		SELP
		C1GALT1C1
		JAK2
		SCCPDH
		GNG2
		PROS1
		VEGFA
		CCNA2
		TIMP1
		CLIC1
		SOD1
		PLSCR1
		THBS1
		P2RX1
		LAMP2
		F5
		FCER1G
		CEACAM1
		TREML1
		HGF
		CHPT1
		PTPN12
		ABCA1
		TIPARP
		MERTK
		PRKCD
		P2RY1
		PLA2G4A
		LPCAT2
		GNA15
		SRGN
		F8
		CASP3
		BLOC1S1
		NBEAL2
		STXBP2
		CYB5R1
		GNAQ
		CLU
		CD63
		TLR4
		QSOX1
		MMRN1
		IFT20
		HIP1
		VAV3
		STXBP3
		PDGFC
DEGs.down Platelet.gene	29	A2M
		SLC9A3R1
		PDGFD
		FYN
		PRKDC
		SNCA
		FAM3C
		PLA2G7
		HIP1R
		DGKA
		PCYOX1L
		DGKE
		PRKCQ
		PRKCH
		CALM1
		MEF2C
		MYH9
		CTSW
		CBLB
		LCK
		ITPR1
		PLEKHA1
		ARRB1
		TXNIP
		PECAM1
		TXK
		ZNF385A
		CD40LG
		LRIG2
DEGs.up	2006	MSRB1
		RAB2A
		RPS17
		INSL3
		DPY30
		KCNJ2
		KCNMA1
		SMARCD3
		GSKIP
		MMGT1
		GLT1D1
		WASF1
		COX7A2L
		NAPRT
		ATP5F1
		CLK4
		KLHL2
		GLTP
		NCF4
		PXYLP1
		POLK
		GALNT3
		SUMO1
		TMC4
		LRRC6
		UQCR11
		C1RL
		TPX2
		NTSR1
		HIST1H4J
		FNBP1L
		CCNB1
		CDK14
		LOC101929243
		ERG
		RPA4
		MIER1
		SYCP3
		FGR
		AATK
		COX15
		MSRB3
		STK16
		XK
		AQP9
		CEACAM6
		COX6C
		AP3S2
		NSMCE2
		UNC5A
		OSBPL8
		LRRN1
		C4orf3
		SRPK1
		ANP32E
		LOC93432
		FFAR3
		NMNAT1
		RHOT1
		ARL4A
		DAD1
		PTPN22
		LOC101927603
		KIAA1033
		TMEM180
		SLK
		GINS1
		EIF4G3
		ACTR10
		LOC101928111
		ACSL3
		TRIQK
		GRPEL1
		RELT
		SNX16
		SIGLEC9
		ANXA3
		TLR1
		GJA9-MYCBP
		RP11-373D23.2
		ELANE
		INTS6
		TOPORS-AS1
		KPNA2
		SLC8A1
		USP32P2
		RAB33B
		TMCO3
		ZCRB1
		SUPT4H1
		ANLN
		BIRC5
		FAM63B
		CST7
		DCAF4L1
		SPATA1
		SPTSSA
		DNAH17
		MKNK1
		DYSF
		MFF
		SLFN12
		CLEC4E
		RAD23B
		VWA5A
		MTRR
		KIAA1715
		GTF2H2
		LAIR1
		LAMTOR2
		EVI2A
		RBPJ
		CEP170
		CORO2A
		MAOA
		DNAJC5
		LINC01410
		PPP1R3D
		HIST1H2AD
		CHST15
		CETN3
		FPGT
		AP006222.2
		CDK1
		C17orf99
		NDUFA8
		FABP5
		LOC158960
		SLC16A5
		WBP4
		SORT1
		ASCC1
		CD82
		COPS4
		LOC440149
		NFE4
		MCU
		GCLM
		TICAM2
		SCP2
		KL
		SAMSN1
		C11orf73
		ALCAM
		LA16c-380H5.5
		NME8
		TAF12
		RP4-647C14.3
		ERLIN2
		COX8A
		SF3B6
		RP13-258O15.1
		CARD8
		RALY-AS1
		PEX11G
		TMEM59
		TMEM92
		SNX6
		CDC42EP3
		MICU1
		MTX1
		BAMBI
		EBPL
		LINC01270
		GMFG
		GBGT1
		PIK3AP1
		MAPRE1
		RP1-68D18.4
		DPYD
		RGL1
		KCNE3
		ANKRD49
		ERO1L
		COX7A2
		CTD-2033C11.1
		PSMC3IP
		ZNF467
		PRDX4
		TMEM33
		HINT3
		CTC-338M12.4
		NTAN1
		CDC6
		PLD1
		VPS25
		ASNSD1
		TM6SF1
		NFIL3
		FUT4
		NUDT16P1
		HIST1H2BJ
		GCA
		SLC35A5
		SLC22A16
		VSIG10L
		ARL6IP6
		GLA
		TMEM11
		MRPL15
		NQO2
		NEU1
		RP11-330O11.3
		ARPC3
		ADAMTS2
		SPRY2
		PJA2
		LOC101927451
		GMFB
		APOBEC3B
		AGTPBP1
		LILRA6
		MGST1
		AURKA
		AGTRAP
		MMP27
		ASAH1
		PNPLA6
		BST1
		PIGF
		UBE2W
		KIF14
		MYEOV2
		LOC101929741
		TRMT6
		HK3
		DHFR
		FAM126B
		PPP1R12A
		ATP6V1C1
		EMR1
		CHMP2B
		ARID5A
		RARA-AS1
		CYSTM1
		C7orf60
		SETD8
		IFI27
		SKAP2
		HP
		KRCC1
		SNHG9
		BCL2L15
		MILR1
		HCK
		DYRK4
		CSTA
		TFEC
		CLTCL1
		LSM3
		PLSCR4
		ECRP
		TIPIN
		TNFAIP6
		CTA-445C9.15
		CASP5
		ETFA
		NDUFA13
		VMP1
		LINC01093
		HRH2
		MTMR6
		UBTD1
		ENTPD7
		CASC4
		MRPS28
		IER3
		YWHAH
		TOR1AIP1
		FHDC1
		CEBPD
		BCKDK
		MOSPD1
		RP11-38P22.2
		ADCY3
		POC1A
		CXorf23
		ERMAP
		PDSS1
		PGAM1
		ATP8B4
		FAM114A2
		GJA9
		GLDN
		SLA
		OSER1
		LOC101926963
		MIR6732
		YPEL5
		LXN
		LRRC42
		RP11-502N13.2
		FAM177A1
		LOC101929687
		COQ5
		ABCC2
		FAM160B1
		TNFAIP8L3
		KIAA0930
		MPC2
		RNF7
		METTL7B
		NOP10
		KIF4A
		BC043356
		ANKRD22
		PGM1
		CPD
		NAIP
		XRCC4
		TANK
		PGLYRP1
		AOC1
		MAP1LC3B
		HIST1H4L
		CYB5R4
		PECR
		TBC1D8
		SIGLEC16
		LOC101928429
		SERP1
		PDE6H
		SVIP
		LAMTOR3
		DSE
		NFKBIZ
		TNFRSF17
		RAB20
		CD177
		RHCE
		CASP1
		PLIN3
		ZBTB8OS
		RP5-1065J22.8
		IGFLR1
		HAUS4
		LOC100129550
		APOA2
		GNS
		THOC7
		EMR2
		IFNAR1
		TREML3P
		LAMTOR5
		OSM
		SUMF1
		APOBEC3A
		SPIDR
		OLR1
		HCFC1R1
		GLIPR2
		TEX2
		CBS
		GALNT2
		AC008753.4
		COX7B
		TMEM185B
		TRAPPC5
		UBE2J1
		STK3
		REPS2
		TLR5
		ANO10
		FCAR
		FOXN2
		IL18
		NKAP
		USP35
		IMPA2
		ZCCHC10
		TRPM2
		IK
		LINC01000
		CCNDBP1
		KIAA0232
		DPY19L3
		FKBP5
		ACE2
		STRN3
		CHMP3
		DNA2
		DPY19L1P1
		FAM107B
		IRS2
		ECHDC3
		ZFAS1
		FLJ36848
		PIM3
		RPL39
		BTBD10
		SNRPG
		FAM160A2
		SCFD1
		ACOT9
		PDE4D
		ROPN1L
		DLEU2
		RABAC1
		HBQ1
		TDRD9
		FBXL5
		RP11-499E18.1
		NDUFAF1
		ZNF354A
		RASGEF1A
		UQCRQ
		BCL6
		WSB1
		DHCR7
		ERH
		POR
		ZWINT
		ABRACL
		FAM96A
		FAM89A
		NDC80
		RNF175
		SLC31A2
		RP11-792A8.4
		USMG5
		C2orf69
		VAT1
		LOC101930114
		ARPC1A
		DHRS7B
		ZBED6
		NATD1
		TXNDC12
		ATP6V1E1
		MCTP2
		BIRC2
		SOCS3
		PIGK
		HIST1H2AG
		LOC100289361
		DNASE1L1
		IL10RB
		CCDC23
		CGRRF1
		ALPK1
		PLOD2
		CHIT1
		RPS24
		TPST2
		TSPAN2
		RPL27
		PCSK9
		SLC35A1
		GPR160
		HIST1H2BE
		NUF2
		RGS18
		SLC11A1
		BROX
		MIR21
		LINC00672
		AUH
		INTS12
		CAHM
		RALB
		KIF1B
		B4GALT4
		TNFAIP3
		FAM228B
		PSRC1
		ARL8A
		ALAS1
		ATG3
		NUDT16
		C17orf62
		NDUFV2
		SMIM1
		LILRA5
		AMPD3
		B9D2
		ST6GALNAC3
		PPP4R1
		HYAL2
		PTTG1
		CTDP1
		STYXL1
		IL18RAP
		FBXO30
		CDCA5
		CDC40
		CARD16
		UBE2T
		CREM
		MKKS
		CHMP4C
		EPCAM
		TRIM6
		SSFA2
		BCL2A1
		CKS2
		TP53I3
		CR1
		TOR1A
		SLC25A24
		MRPL22
		GADD45B
		ACER3
		DAAM2
		MS4A3
		ATG4A
		MOCS1
		ZNF608
		COMMD8
		NDUFB3
		RP11-981G7.6
		FPR1
		SYN2
		DEPDC1
		COX6A1
		USP38
		ZDHHC17
		VPS29
		RAB24
		RP3-508I15.21
		CRADD
		GSR
		SLC25A40
		COL9A3
		FIG4
		C6orf211
		PTTG1IP
		GGH
		PSMD9
		PAM
		BPGM
		ME2
		KPNA4
		MAN1A1
		LINC00493
		KMT2E-AS1
		SERPINB8
		FEM1C
		SIAH2
		ATP11B
		LOC731424
		EXT1
		CLEC4D
		ABHD5
		BATF2
		CENPE
		EMB
		LMNB1
		NRN1
		SPAG5
		MYL12B
		SLC2A14
		SRP14
		ACADM
		DUSP3
		HHEX
		EMC2
		CR1L
		C9orf72
		MPZ
		NAMPT
		ACOT13
		PTGER2
		BC079832
		RP13-270P17.3
		MMP8
		HAUS1
		HDAC4
		HS3ST3B1
		SFXN1
		SPPL2A
		FAR1P1
		GHITM
		ROMO1
		PFKFB2
		IL10
		CA4
		ATP9A
		GPR97
		LOC283075
		TLR10
		UQCR10
		WDFY3
		GADD45A
		DPM1
		RP4-612B15.3
		CLIC4
		NARF
		mir-223
		TMEM70
		ALOX5AP
		HIST1H2AM
		DQ570835
		RIPK3
		RCHY1
		OLFM4
		RHOU
		SH3PXD2B
		SPRY1
		LILRB3
		SPI1
		SERPINI1
		MS4A4A
		PADI4
		RP11-111M22.3
		RP11-1275H24.2
		SNX18
		BC032415
		EFHD2
		CXorf31
		ZDHHC3
		FBXO9
		TMED8
		RP11-36B6.1
		GBE1
		MRPL13
		MED7
		CMC2
		C12orf5
		SIRT5
		MSRB2
		RP3-368A4.6
		RNF146
		HIST1H2AJ
		CCNB2
		FZD5
		NECAP1
		RP1-193H18.2
		MIR6125
		KIAA0391
		SIRPA
		CSGALNACT1
		AK025288
		APTR
		PRC1
		HIST1H4D
		NAA38
		TYW5
		SMAD1
		RPS3A
		CEACAM21
		SLC22A15
		UPB1
		ABHD13
		CCPG1
		DBI
		LOC102723779
		LOC102723845
		BAZ2B
		CENPW
		TTC8
		AGL
		ZDHHC20
		CEP55
		DEFA1
		TCEB1
		RPL34
		TMEM91
		ARL6IP5
		LOC101060510
		SEC61G
		DEGS1
		CCDC17
		ATXN7L3
		CD163L1
		DDIAS
		KLF5
		MGST2
		UBL5
		CTB-167B5.2
		TACSTD2
		RBBP8
		TMEM167A
		ATP5J
		SRP54
		CPEB4
		TMEM52B
		VAMP5
		ACSL1
		ADORA3
		FAM206A
		LINC01268
		SLC30A1
		KLHL18
		LINC01094
		CCNE2
		CDC45
		SWSAP1
		CWC22
		C16orf72
		GPER1
		MPLKIP
		ZCCHC17
		SLC25A20
		NDUFA1
		HSPE1
		SYNE1
		S100A2
		CMTM4
		HIST1H2AC
		PSMD10
		LOC100506119
		GTF2B
		ARPC1B
		CDK7
		HIST1H3C
		LOC101927272
		C5orf30
		HIST2H2AA3
		FAM72A
		IL17RA
		SYF2
		SPA17
		RPL9
		RAB32
		RNF111
		DDX43
		LHFP
		RP11-295G20.2
		LOC101928635
		C7orf55
		GALNT14
		MRPS36
		POLE4
		RB1
		CNIH4
		FKBP15
		PSMD4
		LYSMD3
		ERLIN1
		LOC101928830
		GLRX
		HIST1H2BK
		ST3GAL4
		SHOC2
		ST3GAL4-AS1
		RHOG
		LOC100272216
		GNG11
		NABP1
		UNC50
		OSBPL9
		PLIN5
		GPR84
		AX746823
		ARFGAP3
		IL1RN
		RPA3
		MICU2
		AK6
		DLGAP5
		MSMO1
		ZFYVE16
		GRINA
		LOC100505635
		HAT1
		C5orf27
		PHTF1
		EMC6
		TWIST2
		MIR22
		STX10
		SEC62
		PQLC1
		DDX59
		CYB5R2
		U91328.2
		DNTTIP2
		ZNF143
		SGSH
		ZNF106
		AZIN1
		RP11-533E19.7
		RNASE1
		UBE2A
		ADAMTS3
		MKI67
		VPS54
		SLC39A8
		FFAR2
		DCAF10
		IL4R
		SLC1A3
		SEC11A
		SHROOM4
		C18orf32
		EIF1AY
		MAFG
		TOMM5
		EMILIN2
		ENTPD1
		GDE1
		ZNF438
		CBX3
		VASP
		PLGRKT
		EXOSC4
		FGF13
		C11orf48
		PRDM5
		PPP4R2
		BC042374
		CDCA2
		RPS27L
		SIGLEC5
		PPA2
		GGTLC1
		SRA1
		ZNF615
		BAG4
		PPIP5K2
		LOC439994
		RPS6KA1
		TBC1D15
		APH1B
		ADAM17
		MRPS21
		IMPA1
		CLEC5A
		TMEM120A
		EXO1
		HIST1H4H
		RP11-389C8.2
		CCDC71L
		CFLAR
		IGBP1
		LRG1
		STAM2
		LZIC
		CDKN2C
		KCNJ2-AS1
		ADCY4
		CUTC
		ADM
		TCTEX1D1
		GTF2E2
		ZMAT2
		FPR2
		MLKL
		FCGR1A
		DLC1
		IMPDH1
		ANKRD33B
		RAP2C
		KCNH7
		IDH1
		AZI2
		CHURC1
		SEMA4A
		RAB1A
		MUSTN1
		MDP1
		MANSC1
		LOC101929328
		FNDC3B
		NUDT4
		MICAL1
		BLZF1
		PCTP
		MROH6
		FBXO38
		CD164
		MRPL51
		RP5-1102E8.3
		TMEM167B
		MARCO
		TDRD7
		CTSA
		HIST1H2BD
		NSUN7
		IGSF6
		C14orf142
		HPSE
		MMADHC
		BMX
		RNF181
		AIG1
		COLGALT1
		ZMPSTE24
		CWC15
		SKIL
		RPL31
		PSMB3
		NLRP12
		RAB10
		RP11-456P18.2
		ZBTB7B
		SHOX2
		ITGA7
		LOC100130938
		NFKBIA
		C2orf47
		DEK
		ZFAND2A
		C4BPA
		ARHGAP24
		C1QA
		TPST1
		PFKFB4
		TMEM132D
		RNF11
		ANKRD32
		FAM47E
		CLEC12B
		LOC101928826
		FUT7
		EPAS1
		MYL6B
		S100A12
		POLR3GL
		GYG1
		RAB18
		VAMP7
		MRPL36
		TIMP4
		NRBF2
		HSDL2
		FBXO6
		CCP110
		NXT2
		JDP2
		GAPDH
		COX7C
		ZC3H15
		SUCNR1
		TLR2
		WFDC1
		C14orf2
		COMMD6
		GALNT1
		SLC39A1
		TMLHE
		CIDEB
		DNAJB14
		SEC24A
		IFITM1
		KIAA0101
		B4GALT5
		WRB
		TRMT1L
		BPI
		IL18R1
		VNN2
		HIST1H2BH
		MCMBP
		HIST1H2BO
		NOXRED1
		TMTC1
		TTC33
		AC010980.2
		RP11-231E19.1
		ERGIC2
		PCOLCE2
		NAT1
		CYBRD1
		TCN2
		FBXL4
		CDA
		TMEM88
		PGS1
		FSD1L
		MIEN1
		NFU1
		TBC1D23
		SFXN5
		NRD1
		CHCHD2
		NME1
		SESTD1
		ZUFSP
		CEBPE
		LACTB
		CCDC126
		FAM101B
		CEBPZOS
		TMEM208
		TMOD3
		LY96
		RP6-99M1.2
		IL1R1
		HSBP1
		EDEM3
		ZNF776
		IFI27L2
		RANBP9
		RGL4
		C4orf46
		LOC100505812
		PYCARD
		TMEM110
		TMEM256
		NEK2
		ACSL4
		C1orf162
		ARL8B
		HIST2H2BE
		UQCRH
		FLVCR2
		KAT2B
		CYP1B1
		LYPLAL1
		ALPL
		FOLR3
		SPC24
		RBMS1
		B3GNT2
		ISCA2
		ABCA13
		RP11-521I2.3
		ZNF780A
		PNP
		DUSP13
		BC062763
		CKAP4
		HMGB1
		MCTP1
		LBR
		PGK1
		OAT
		AGPAT9
		BAIAP2L1
		PLOD1
		RP11-394I13.2
		GMPR2
		B3GNT5
		ANKS1A
		ATOX1
		CTD-2165H16.3
		UGCG
		PRCP
		OTUD1
		RNF135
		ORC3
		RP11-6I2.3
		RAE1
		NDUFB1
		CCNA1
		NBN
		BID
		CCDC59
		LINC00884
		NFE2
		ANXA1
		FRMD3
		AGFG1
		TBC1D14
		SLC28A3
		ERI1
		ROGDI
		S100P
		C1QC
		CAPN3
		SPTLC1
		HMGB3
		HLTF
		NLRC4
		POLI
		ECHDC1
		CATIP-AS1
		NDUFA6
		PTRHD1
		SLC22A4
		GNAI3
		KCNE1
		C20orf24
		NETO2
		SLC37A3
		SQRDL
		NUP214
		TPD52L2
		RP11-686D22.8
		LOC102724587
		FAM20A
		CDK5RAP2
		CLRN1
		ZNF230
		GK
		RPL36A
		BIK
		DERA
		ALOX5
		RAB8B
		TAF7
		DIRC2
		FBXO8
		MAB21L3
		LOC101928963
		SMIM3
		BASP1
		PSMA1
		LYRM1
		TMEM60
		RNF141
		TBK1
		MSL3
		PRL
		MIR6824
		STAG2
		MOB3C
		ARL11
		DEFA4
		CD55
		LYPLA1
		NMRK1
		PROK2
		MAN2A2
		LINC01127
		CSGALNACT2
		DACH1
		LOC101929132
		YOD1
		PHKA2
		RP11-196G18.23
		NAPG
		RSL24D1
		UBE2F
		MRVI1
		TMEM45A
		YIPF4
		MPP7
		ATP5I
		GJB6
		PLP2
		COQ7
		AC092192.1
		FBN2
		CHMP5
		KIAA1958
		NEDD4
		MDH1
		DPH3
		GUSBP3
		CACNA1E
		YTHDF3
		CEACAM8
		AMN1
		PAQR6
		OSTF1
		SLC26A8
		CMTM1
		CAPZA2
		AQP10
		LPGAT1
		PLTP
		PCYT1A
		HENMT1
		LGALS1
		GLRX2
		MFAP3
		ATP11A
		PCMT1
		ARL5B
		MRPL33
		AKIRIN2
		ACRC
		PELO
		FAS
		IDI2-AS1
		MOSPD2
		RP11-17A4.3
		FOXC1
		HIST1H3B
		LOC100049716
		CLEC2B
		JTB
		TNFSF10
		THBS3
		NEIL3
		DYNLT1
		RTN3
		KIF11
		INSC
		PSMB6
		SLC2A3
		SLC40A1
		ARID3A
		ATP13A3
		C3AR1
		GNG5
		COA6
		UBLCP1
		KIF5B
		TWF1
		MRPS17
		ARF4
		ZNF117
		HSD17B11
		SH3GLB1
		ZNHIT1
		KIF18B
		KBTBD6
		GNG10
		PAG1
		SOS2
		MEF2A
		LOC100506299
		DEFT1P
		GPCPD1
		ADORA2A
		C9orf66
		MRVI1-AS1
		RNASE2
		RP11-333I13.1
		NTNG2
		FGD4
		HIST1H2BC
		EFCAB7
		APMAP
		CCDC186
		SWT1
		LRRC4
		ETS2
		BNIP2
		IGFBP7
		PRDX1
		UFD1L
		COX17
		LOC101928386
		SIPA1L2
		PPARG
		BBS10
		JAG1
		HIST1H2AL
		DHX40
		DHRS13
		DSC2
		IDNK
		LSM10
		MYO10
		PPIG
		RP11-173M1.8
		MYL6
		IL1RL1
		PLXNC1
		FCGR1B
		SNX10
		RGS19
		NUPL1
		RPL22L1
		LINC00862
		FBXW2
		RDH5
		CD58
		MCEMP1
		DNAJC3
		TMEM8A
		TMEM165
		RPS19BP1
		PSMC6
		RP11-440I14.2
		CPNE2
		FAR2
		FBXO33
		CHST13
		NR2E1
		GOLGA1
		MS4A6A
		FAM188A
		VAPA
		MEA1
		MTF1
		PCNX
		GUCY1B3
		C4orf48
		RP1-179N16.6
		BC048103
		MAP2K6
		CHCHD7
		ASPH
		LYRM5
		FLOT2
		HDGFRP3
		CKS1B
		ARPC5
		LOC101929177
		PPM1M
		CDKN2D
		LSMEM1
		SNRPE
		HIST3H2A
		CARD6
		ZNF20
		STK38L
		STEAP4
		FES
		MAPK14
		SERPINB2
		C11orf71
		MTHFD2
		MYBPC3
		GTF2F2
		RALGAPA2
		MIIP
		SS18L2
		CDADC1
		VBP1
		MORC3
		LOC100506113
		RPL7
		GSTO2
		MAP3K8
		SUB1
		MRPS33
		LOC100134822
		STOM
		LOC101927830
		UQCRFS1
		AIM1
		ZNF281
		MED11
		SNX4
		BC016972
		BLM
		CEACAM4
		COPS2
		ZNF516
		RHBDD2
		PPP1R3B
		SRBD1
		MPO
		FHL2
		ZBTB16
		KIAA1107
		HIGD1A
		SAMD8
		VIM
		SNRPD1
		UQCRB
		TLR8
		ZEB1-AS1
		ITGAV
		RRAGA
		PCNA
		LMO2
		RHAG
		EXOC8
		BRE-AS1
		TNNI2
		LDHA
		EDNRB
		RWDD3
		SGTB
		RCVRN
		CHUK
		C1orf122
		GM2A
		ZDHHC12
		S1PR4
		RAB33A
		LOC100506870
		LIN7A
		SLC38A2
		GPN3
		CAPG
		STARD3NL
		AK9
		LOC113230
		ST3GAL6
		VPS9D1
		ISY1-RAB43
		PARPBP
		MLK7-AS1
		ADAM9
		STX11
		TMUB2
		STXBP5
		TBXAS1
		DNAJA1
		SLC36A4
		UBA3
		IFNGR2
		NDUFA4
		DKFZp667F0711
		ARG1
		LINC01272
		CAP1
		DUSP1
		SLC44A1
		DDAH2
		SLPI
		IRAK3
		OLAH
		STX7
		ADAM10
		GALC
		DRAM1
		CHCHD1
		ZDHHC19
		TREML4
		TTC32
		PNPLA1
		SLIRP
		CDC26
		FAM53C
		TPM1
		TMEM169
		SMPDL3A
		MTIF3
		RBX1
		COL4A3BP
		TSNAX
		MEGF9
		TECPR2
		HIST1H3G
		COX7BP1
		PFKFB3
		LIG4
		DAPK2
		RUNDC3B
		HOXA10-HOXA9
		VSIG4
		CENPA
		OSTM1
		RP3-507I15.1
		SLC12A9
		IPMK
		CAMP
		C14orf166
		GALNT7
		ZSWIM6
		GBA
		CYYR1
		IL1RAP
		UBXN2B
		PRDX5
		TRIB1
		FLJ30064
		EDEM2
		TOM1
		PTX3
		KCNE1L
		CDC20
		C2orf76
		ANG
		PRUNE2
		C8orf88
		ARMC12
		SLC35B3
		G0S2
		ACPP
		PRO2852
		HPGD
		LOC101927974
		CTSD
		EEF1B2
		ARHGAP19
		PMCH
		S100A6
		ATG9A
		QPCT
		HIAT1
		RP11-548H18.2
		PFDN5
		NSUN3
		CMTM6
		H2AFZ
		CRISP2
		LOC100289098
		PNPLA8
		RP2
		ELMOD2
		S100A8
		SNX14
		ARRDC4
		LOC101928143
		MFSD1
		SIRPD
		LOC339874
		LEMD3
		PLEKHF2
		CHKA
		RAB31
		RNF138
		UBAP1
		AIF1
		ANKRD9
		LOC101928274
		MR1
		MB21D1
		AP3B2
		TCAIM
		ZNF292
		GK-AS1
		IFRD1
		ZNF267
		PSMC1
		RFXANK
		LINC00266-1
		CRISP3
		TMEM41B
		LAMC1
		SRP9
		RPL36AL
		PDCD10
		HEBP2
		DCTN6
		MED30
		GALNT4
		GRAMD1A
		TROAP
		HMGB2
		PTAR1
		BATF
		MED23
		LOC102724782
		UFC1
		PSMD14
		VPS8
		H1F0
		TOR1B
		STAG3
		ETF1
		ING2
		PSTPIP2
		LTB4R
		DHRS9
		UBE2D1
		HSP90AA1
		CREB5
		ISY1
		FAM200B
		CCRL2
		ACSS2
		SUCLG1
		MKNK1-AS1
		CNEP1R1
		SH2D4A
		KIAA0040
		WDR47
		MIR6787
		HSD3B7
		MLX
		PSMA2
		PSMA4
		ITGAM
		PGM2
		RILPL2
		STX3
		SKA3
		MCTS1
		NCAPH
		COX7A2P2
		TIGD7
		ARPC2
		MGAM
		P2RY13
		RTN4
		TK1
		TAX1BP1
		ASGR2
		IVNS1ABP
		CD163
		SAP30L
		GIMAP2
		BTBD3
		PRKAR2B
		OPLAH
		FOSL2
		GRB10
		SLC8A1-AS1
		HIST1H1B
		FAM103A1
		NIPSNAP3A
		H2AFJ
		LRIF1
		LOC153546
		INSIG2
		GPR65
		PTCSC1
		HSPA13
		FASTKD3
		RMI1
		OSCAR
		LATS2
		SELK
		MYD88
		SCYL2
		GADD45G
		LOC100288675
		SLU7
		CC2D2A
		B3GNT8
		CMTM2
		ASPM
		NT5C3A
		HSPE1-MOB4
		VCPKMT
		SIRPAP1
		SERTAD3
		CD59
		MOSPD3
		CD24
		CAPZA1
		ARHGAP18
		CCR1
		DNAJA2
		PTPRN2
		EIF1B
		LSM6
		ATP5L
		COPS5
		TVP23B
		FAM105A
		DRC1
		SCPEP1
		POMP
		INHBA
		KLF7
		EAPP
		METTL9
		ATP5O
		SP100
		COX6B1
		MAPK6
		FAM198B
		SLC36A1
		TCN1
		SRXN1
		RNFT1
		LINC00528
		HTATSF1P2
		LILRB1
		PYGL
		CTSG
		LOC101928290
		NUCB2
		JKAMP
		LOC101928419
		TAF13
		PIWIL4
		HIST1H1T
		JMJD6
		HIST1H2BG
		GPR27
		SLC16A6
		SBF2
		RNASE3
		ERV3-2
		ETFDH
		POLR2K
		TBCA
		KREMEN1
		UBE2C
		TFDP1
		MND1
		NDST2
		SPTLC2
		METTL22
		IL1R2
		YIPF1
		TRAPPC1
		FLT3
		LOC102724323
		CKLF
		TSPO
		SLC9A6
		CCDC53
		TRAPPC8
		GK3P
		FADD
		TBPL1
		STX12
		VNN1
		C5orf66
		SERPINB1
		ORMDL2
		DDIT3
		CASC5
		ST20
		ENY2
		DOK3
		GDPD3
		PTGR1
		TDG
		C9orf84
		FOS
		CREG1
		LOC100507642
		AGPAT2
		LOC645984
		RETN
		WIPI1
		JUNB
		TNFSF13B
		DENND3
		SLC18A2
		TSHZ3
		SSH1
		SAP30
		RNF144B
		PDZD8
		HTATIP2
		ETHE1
		IDI1
		PPP4R1L
		FNDC3A
		LAMTOR1
		RRM2
		TMEM71
		METRNL
		KLHL12
		TOP2A
		KLHL8
		UBE2E1
		SIL1
		PRTN3
		TPK1
		NECAB1
		FAR1
		CPNE3
		EFEMP2
		MTHFS
		ANKRD50
		ICAM1
		RBM47
		DGAT2
		TSG101
		ABHD3
		RNASEL
		TMEM260
		RP11-305O4.3
		LOC101927057
		CRBN
		PLBD1
		CHIC2
		CYP1B1-AS1
		FGFR1OP2
		TNNI3K
		ACAA1
		CTSL
		CA2
		LTF
		FAM32A
		TIMMDC1
		ZNF319
		GBAS
		FAM172A
		CTBS
		DCP2
		GIN1
		PRR34-AS1
		PRPF18
		C1D
		CXCL1
		GTDC1
		USB1
		SPC25
		SGMS2
		MXD3
		VAMP3
		TIMM8B
		SLC30A6
		WDFY3-AS2
		PPAP2B
		TMCO1
		DNTTIP1
		PAPSS1
		PARL
		C19orf33
		HIF1A
		GRN
		BEX1
		COMMD3
		SHFM1
		ABHD12B
		TSEN34
		C1QB
		KIF18A
		TGFA
		TMEM170B
		TAS2R40
		KIF15
		TRIP4
		AP3S1
		SNX3
		SPRY3
		PADI2
		SDF2
		AX747191
		CAB39
		CD48
		GAFA3
		RIT1
		ZEB2
		RP11-382F24.1
		RHBDF2
		CEBPA
		PET100
		FLJ23867
		RAB13
		BUB1B
		SELT
		EIF4E3
		CCNH
		COX5B
		NEDD8
		TMX1
		BAZ1A
		CLEC12A
		HJURP
		ARID4A
		COL17A1
		SYCP2
		LOC102724364
		MSRA
		NMI
		ERVK3-2
		ZNF100
		C1orf226
		SDHC
		IPO11
		LINC00671
		ACVR1B
		IFNGR1
		SMIM20
		COPB1
		MRPL21
		LOC100506459
		FW339973
		LLPH
		ORAI2
		LRRFIP2
		CDC123
		C9orf89
		NT5C2
		EFCAB2
		DDX60L
		WDR41
		GAS7
		CTNNAL1
		C8orf76
		BTBD19
		LOC441081
		ACN9
		DLD
		CDK5
		TOMM40L
		PHF20L1
		SERPINB10
		RAB11A
		HMMR
		PTBP2
		TMEM30A
		CD300LF
		CLEC18A
		PKM
		WSB2
		RPS7
		JAK3
		GBAP1
		C7orf25
		CLRN1-AS1
		GSTO1
		MAD2L1BP
		CETN2
		FLOT1
		HNRNPLL
		LSM1
		PPP2R3C
		SLC25A28
		FAM217B
		PRO1483
		TMEM55A
		TMEM258
		UPP1
		NDUFS5
		CISD1
		MLNR
		DNAJC3-AS1
		ZNHIT3
		SNRPD3
		GNPAT
		HIST1H2BM
		GMNN
		LILRA3
		CAMKK2
		SLC9A8
		RAB27A
		TBC1D2
		CSF2RA
		LOC102724387
		KIF20A
		ITPKC
		PLB1
		RRAGD
		CLEC4A
		SMIM15
		AIM2
		ZNF654
		SGOL2
		GNAT2
		TIMP2
		ATP5C1
		H2BFS
		HIATL1
		ZNF222
		ARMC2-AS1
		ANAPC15
		RLIM
		LCN2
		ELL2
		YKT6
		TXN
		ASB7
		SFT2D1
		PLAC8
		LGALS8
		ATP6V1D
		FKBP9
		HIST1H2APS4
		FAM209B
		KCTD21
		LOC100506100
		HNRNPH2
		TMEM119
[truncated: 2,037 more rows]
